# Supplementary material for: Prediction of wheat fusarium head blight severity levels in southern Henan based on K-means-SMOTE and XGBoost algorithms
Source: PeerJ journal article supplement (doi:10.7717/peerj-cs.2638), 2025-03-31
Supplement: Supplemental_Files2.zip [file Supplemental_Files2.zip]

## Sheet: Sheet1
RAIN	AWS	AT	HT	LT	ARH	ASH	MTD	Wheat FHB Severity Levels
81.8	1.7	7.38	12.78	15.02	77	17.6	15.9	3
66.6	1.72	11.74	18.48	11.86	70.4	27.2	15	3
52.5	0.96	8.7	15.3	14.32	74.2	7.5	16.7	2
109.6	1.62	10.4	16.62	14.9	67.2	27.7	14.2	1
20.6	1.58	11.74	17.58	11.4	57.6	26.5	17	1
21.6	1.34	8.32	11.36	13.52	75.8	11.4	15.4	2
22.6	2.5	15.8	24.78	13.92	65.8	38.8	18	1
3.9	2.58	20.28	27.16	14	63.2	43.7	14.6	0
57.3	1.08	6.86	10.86	14.56	70	8.7	19.2	2
37.4	2.88	10.08	16.8	11.74	75.6	15.3	22.9	1
133.1	2.06	7.5	13.68	15.38	78	8	14.9	1
15.3	3.16	9.38	16.18	14.28	62.2	26.9	21.4	0
10.2	2.62	11.3	17.92	11.2	46.8	24.9	21.7	0
12.3	1.96	7.78	11.7	11.92	70.8	12.3	14.6	0
2.3	2.78	14.46	22.78	11.22	61.8	33.9	18.5	0
5	2.8	16.58	24.92	11.3	72.2	45.6	19.2	0
55.6	1.68	7.36	12.58	15.58	74.8	23.4	13.5	1
79.7	2.12	11.7	18.24	13.12	65.6	28.4	15.1	1
51.8	1.12	9.16	15.22	15.54	80.2	9.1	14	1
38.8	1.78	10.68	16.38	15.64	67.8	29.7	11.7	1
26.6	2.5	11.92	17.42	11.82	49.4	25.6	15.2	1
17.2	1.74	8.52	11.86	13.84	83.6	11	14.6	1
28.4	2.2	16.32	24.62	15.46	68.4	39.9	16.3	1
3.2	2.18	20.12	26.78	14.26	67	38.8	14.9	0
36.5	1.14	6.72	11.12	13.58	75.6	18.2	17.5	2
42.4	2	9.54	16.74	11.44	81.6	35.6	21.4	0
42	1.44	7.48	13.64	14.64	80.4	9.5	14.4	1
11.8	2.08	7.98	14.72	13.56	70.8	36.5	19.7	0
12.5	2.5	10.04	16.7	9.6	60.6	31	25.9	0
1.3	2.3	7.58	11.64	10.86	74	16.6	14.2	0
0.1	2.58	13.7	22.06	10.72	59	34.6	23.4	0
2	2.74	16.4	25.46	11.66	63.4	49	15.5	0
71.3	1.94	7.44	12.08	15.72	71.8	18.4	13.5	3
55.8	1.86	12.18	18.54	13.16	66	36.8	13.9	1
25.5	1.16	8.7	14.9	14	67.2	7.7	15.7	3
73.3	2.16	9.82	15.76	15.82	64	28.6	12.6	1
14.7	2.56	11.74	17.4	11.42	50	27	18.8	1
14.9	1.64	8.62	11.12	13.68	77	15.5	14.7	1
1.9	2.62	15.72	24.3	13.46	70.4	40.7	17.1	1
13.7	2.14	18.9	27.6	13.92	63.2	47.2	14.9	0
79.5	1.98	7.42	12.1	16.58	65.8	17.3	13.6	3
72.5	2.4	12.16	18.3	14.96	63.2	28.4	15.7	1
39.5	1.7	9.36	14.9	16.54	76.4	5.5	12.6	1
28.7	2.2	10.8	17.06	14.62	61.2	26.2	13.9	1
22.7	2.06	12.38	18.3	12.46	43.8	25.3	14.9	1
24.8	2.06	7.48	10.44	13.48	68	11.9	14.4	1
13.2	2.9	16.72	24.32	15.94	64	35.9	16.2	1
3.2	2.26	20.98	27.16	13.44	60.8	43.6	13.8	0
58.1	1.32	7.02	11.56	15.18	76	15.4	16.4	3
64.6	2.22	10.58	17.02	12.2	76.8	24.8	17.3	1
55.6	1.52	7.96	13.7	14.74	84.8	7.1	13.1	1
36.3	2.76	9.08	15.22	14.5	70.4	31.2	18.2	1
20.6	2.46	10.66	17.08	10.7	55.4	27.6	21.7	1
9.4	1.98	7.4	11	12.6	77.2	16.3	15.1	1
0	2.7	14.22	22.62	11.62	61.8	38.4	20.8	1
3.6	2.12	17.22	26.22	12.88	68.4	48.4	14.9	1
59.7	1.6	7.14	11.08	14.58	70.8	12.5	19.7	1
51.7	2.1	11.54	17.52	11.42	83	27.2	19.8	0
74.9	1.6	7.78	14.06	15.6	85.8	9.8	13.6	1
4.4	2.82	9.94	16.46	15.04	64.4	30.8	21.5	0
3.6	2.46	11.76	17.48	11.44	55.8	28.7	21.5	0
15.5	2.18	7.82	11.86	12.44	69.8	10.3	15.2	0
4.3	4.18	14.18	23.12	11.34	67.4	35.4	20.1	0
6.1	3.08	17.06	25.36	11.2	66.8	46.2	20.3	0
33.8	1.22	7.68	11.7	14.12	60	15.1	19.8	0
67.1	0.96	11.3	17.38	11.48	74	23.6	22.8	1
22	1	8.36	15.42	16.48	64.8	6.3	13.5	3
12.2	1.76	9.84	17.34	14.7	58.4	20.9	20.9	0
13.7	1.58	12.44	18.1	10.32	55.2	32.8	22.5	0
7.1	1.26	7.8	11.84	12.32	64.4	10.6	15.7	1
8.4	2.36	15.26	23.04	11.38	69.4	33.8	19.6	0
2.1	1.72	18.16	27.38	11.06	55.2	44.9	19.1	0
32.6	0.92	7.68	11.88	15.72	65	8.2	15.2	1
32.2	1.26	10.9	16.86	13.72	69.8	20.8	19.9	1
66.5	1.7	7.24	14.3	13.38	86.8	12.7	14.4	1
10.8	2.26	8.24	15.22	13.84	73.2	35.2	20.9	1
12.8	2.48	10.18	16.82	10	57	33.3	23.6	0
0	1.98	7.64	11.8	10.7	70	18.5	14.2	0
0	2.26	13.3	21.6	10.94	58.6	32.6	23.8	0
0.3	2.7	16.38	25.38	11.84	59.6	49.4	17	0
46.1	1.06	6.7	11.12	13.72	64.2	16.6	19.8	0
17.6	2	9.46	16.84	12.96	70.2	32.7	23.6	0
54.2	1.42	7.98	13.86	14.06	70.6	10.6	12.8	1
51.7	1.68	8.9	16.26	14.16	62.6	30.1	21.8	0
14.9	2	10.88	18	10.3	50.6	36.9	25.2	0
0	2.4	7.64	12.08	11.4	59	18	16.2	0
2.8	2.18	14.32	23.26	11.9	58.2	32.2	23.8	0
0.7	2.36	18.14	26.64	11.42	66	47.3	16.8	0
31.5	1.18	6.64	10.96	13.7	67.6	18.4	18.5	3
36.1	2.08	9.82	16.44	13	72	31.6	19.9	1
61.8	1.5	7.16	13.94	14.32	76.6	7.5	15.4	1
18.8	1.96	9.12	16.12	14.1	62.2	34	19.1	1
15.5	2.18	11.44	18.1	10.56	51.4	31.5	24.3	0
2.4	1.5	7.96	11.66	11.5	70.6	17.4	14	1
0.5	1.94	14.4	23.14	12.02	57.4	33.1	21.3	0
3.2	2.2	17.4	26.5	12.42	62.2	48.8	17.9	0
37.3	1.1	7.3	11.38	14.46	68.8	16.5	19.1	1
39.2	2.36	10.52	17.34	10.78	81.8	21.9	24.2	1
100.2	1.56	7.74	13.74	15.48	82.2	10.2	15.5	2
9.7	2.6	9.08	16.48	15.02	65.4	25.2	21.5	1
10.2	2.76	10.92	17.24	10.28	67.2	29.2	24.7	1
12.1	1.94	7.3	11.52	12.2	81.4	9.1	14.8	1
1.9	3.12	13.98	22.38	10.28	69.2	34.3	20.4	1
9.3	2.14	15.36	24.78	11.08	67.6	45.1	20.3	0
38.2	0.66	6.46	11.08	13.92	71.6	20.1	16	2
20.7	1.78	8.98	16.8	12.68	76.6	35	21.7	0
91.2	1.68	7.86	14.02	15.04	78.8	12.7	12.2	1
14.8	1.44	8.76	15.56	13.48	59.4	34.4	20.6	0
17.9	1.88	11.72	17.88	10.44	51.2	30.7	25.7	0
0.9	1.6	8.24	12.22	11.48	64.8	14.4	14.8	0
0.4	1.4	15.32	23.26	11.98	59.4	26.9	22.7	0
7.4	1.86	18.12	26.62	12.12	60.4	43.4	15.7	0
32.1	2.1	6.94	10.84	14.72	62.6	11.3	16.7	1
39.9	3	11.8	16.34	13.46	77	32.2	21.3	0
33.4	2.06	8.2	12.72	16.88	74.4	11.5	12.4	1
8.2	4.6	10.28	15.86	14.6	49.8	28.4	18.4	0
9.2	3.3	11.9	16.96	11.32	47.2	29.7	23.4	0
9.7	2.72	7.5	11.16	12.24	65.2	13.3	12.3	1
2.9	3.98	15.42	21.46	12.9	54.6	34.9	19.7	0
14.4	2.32	17.84	24.64	11.56	56.6	46.1	17.6	0
19.7	1.52	5.98	11.34	12.64	66.2	10.9	19.4	1
27.9	3.24	8.92	16.44	11.44	74.2	33.7	25.3	0
26.4	2.48	7.4	13.92	14.28	75.4	15.3	13.7	1
11.3	3.52	8.74	15.62	13.3	58.4	42.8	21.1	0
11.7	2.98	10.9	17.22	9.36	48.2	34.1	22	0
0	3.58	7.76	12.12	10.88	56.8	18.4	16	0
0.6	3.44	13.82	22.44	10.82	58	31.4	25.6	0
0	3.06	17.42	26.64	10.54	63	48.3	16.2	0
58.1	1.18	5.98	10.4	13.98	77.6	13.3	18.5	0
51.1	2.3	9.84	16.5	11.9	69.6	24.7	20.3	0
43.2	1.6	7.28	13.6	14.42	72.6	8	15.5	1
20.1	1.94	8.54	15.32	13.62	64	30.3	19.7	1
23.5	3.04	11.16	17.62	10.14	42.6	28.5	23.7	0
11.3	1.58	7.34	10.62	11.06	69.4	14.9	14	0
0.2	1.86	14.48	23.54	11.34	67.2	34	20.6	0
26	2.54	18.42	26.56	11.8	66.8	46.7	19.1	0
57.3	1.08	6.86	10.86	14.56	70	8.7	19.2	2
25.5	1.16	8.7	14.9	14	67.2	7.7	15.7	3
21.6	1.34	8.32	11.36	13.52	75.8	11.4	15.4	2
58.1	1.32	7.02	11.56	15.18	76	15.4	16.4	3
81.8	1.7	7.38	12.78	15.02	77	17.6	15.9	3
52.5	0.96	8.7	15.3	14.32	74.2	7.5	16.7	2
79.5	1.98	7.42	12.1	16.58	65.8	17.3	13.6	3
66.6	1.72	11.74	18.48	11.86	70.4	27.2	15	3
71.3	1.94	7.44	12.08	15.72	71.8	18.4	13.5	3
38.2	0.66	6.46	11.08	13.92	71.6	20.1	16	2
100.2	1.56	7.74	13.74	15.48	82.2	10.2	15.5	2
28.8232	1.04411	7.51066	11.2382	13.6941	73.9725	15.1856	15.6611	2
55.5699	1.03675	7.52319	12.4603	14.4735	71.5138	8.26748	18.2989	2
25.5007	1.18021	7.88293	11.2942	13.614	74.8131	13.4443	15.541	2
47.1345	0.847437	7.85953	13.7166	14.1699	73.2245	12.2276	16.4374	2
24.3507	1.22732	8.01179	11.3136	13.5863	75.104	12.8416	15.4994	2
56.7986	1.06747	7.0522	11.3238	14.5349	70.4387	8.57465	18.9389	2
24.0509	1.30986	8.35014	11.6725	13.5835	75.6731	11.0907	15.5031	2
37.0767	0.706015	6.58587	11.0989	13.8929	71.8842	19.5113	15.9594	2
45.479	0.812706	7.60021	13.2281	14.1236	72.9235	13.6863	16.3563	2
53.2992	0.992024	6.77621	10.9061	14.4259	70.3351	11.0879	18.5297	2
22.8413	1.28915	8.18092	11.3391	13.5499	75.4859	12.0506	15.4449	2
57.2069	1.07767	6.89568	10.9461	14.5553	70.0814	8.67673	19.1515	2
42.2916	1.08554	8.57446	13.9983	14.0557	74.7286	8.78844	16.2705	2
54.5076	1.01019	7.93042	13.443	14.4204	72.4434	8.0019	17.7456	2
34.7857	0.799864	6.84257	11.1376	13.8377	72.4639	18.3106	15.8766	2
56.408	1.06039	6.84132	10.8703	14.5301	70.0747	9.23238	19.0506	2
54.5148	1.01037	7.92768	13.4364	14.4207	72.4371	8.00369	17.7493	2
51.4345	0.937647	8.53309	14.9856	14.2902	74.0063	8.43884	16.6478	2
26.5462	1.27917	8.38083	11.9907	13.6481	75.5439	10.7757	15.6081	2
48.9936	0.897347	6.68604	10.9557	14.2817	70.6958	13.6577	17.8084	2
44.0092	0.781871	7.36997	12.7943	14.0825	72.6562	14.9814	16.2844	2
53.1728	0.976819	8.44211	14.6777	14.3536	73.6113	7.66819	17.0504	2
52.9852	0.972129	8.51402	14.8512	14.3443	73.7755	7.62129	16.9527	2
57.1979	1.07745	6.89916	10.9545	14.5549	70.0894	8.67446	19.1468	2
22.7664	1.29222	8.18931	11.3403	13.5481	75.5049	12.0113	15.4422	2
33.7369	1.19074	8.46926	12.9076	13.8342	75.1716	9.86815	15.9106	2
55.9112	1.04528	7.39238	12.1447	14.4906	71.2152	8.35279	18.4767	2
26.8581	1.12461	7.73084	11.2713	13.6467	74.4696	14.1557	15.5901	2
52.5629	0.961573	8.67589	15.2418	14.3231	74.145	7.51573	16.7328	2
51.8872	0.947144	8.60401	15.1192	14.3029	74.0886	8.03993	16.67	2
35.3761	0.775678	6.77641	11.1276	13.852	72.3145	18.62	15.8979	2
26.2435	1.14979	7.79971	11.2817	13.6319	74.6251	13.8336	15.5678	2
54.4364	1.00841	7.95771	13.5088	14.4168	72.5056	7.9841	17.7085	2
54.0662	0.999154	8.09963	13.8513	14.3983	72.8296	7.89154	17.5157	2
53.6501	0.988753	8.25912	14.2361	14.3775	73.1936	7.78753	17.299	2
24.5458	1.21933	7.98992	11.3103	13.591	75.0547	12.9439	15.5065	2
36.0693	0.747282	6.69874	11.1159	13.8687	72.1391	18.9833	15.923	2
56.9636	1.07159	6.98896	11.1712	14.5432	70.2944	8.6159	19.0248	2
45.1606	0.813059	6.60577	10.9998	14.1532	71.0169	15.9455	17.1662	2
53.1234	0.975586	8.46102	14.7233	14.3512	73.6545	7.65586	17.0247	2
32.5462	1.20539	8.45461	12.7557	13.8034	75.2332	10.0184	15.8605	2
22.6748	1.32678	8.33322	11.497	13.5478	75.7443	11.2643	15.4452	2
41.3573	0.726237	6.95457	12.0117	14.0083	72.1741	17.3181	16.1546	2
76.9944	1.96778	7.42611	12.0939	16.3172	67.6334	17.6361	13.5694	3
70.4769	1.90147	8.19306	13.2008	15.044	71.5548	19.9411	13.7627	3
75.1185	1.95863	7.43069	12.0893	16.1205	69.006	17.8878	13.5466	3
78.7328	1.96454	7.67693	12.4795	16.2993	66.0736	17.8888	13.6833	3
77.8907	1.97215	7.42393	12.0961	16.4112	66.9776	17.5159	13.5804	3
79.5383	1.97534	7.41933	12.1113	16.554	65.9864	17.305	13.6383	3
79.8902	1.9325	7.41321	12.2154	16.3154	67.6999	17.3509	13.9902	3
75.5729	1.96084	7.42958	12.0904	16.1681	68.6735	17.8268	13.5521	3
78.7972	1.96583	7.65536	12.4476	16.3228	66.0506	17.8394	13.6763	3
74.9798	1.85589	7.41897	12.3253	15.4747	73.6224	18.1196	14.3411	3
78.3588	1.97443	7.42278	12.0972	16.4603	66.635	17.4531	13.5861	3
71.163	1.93359	7.56536	12.2666	15.6075	71.7592	18.6566	13.5437	3
79.9267	1.92805	7.41258	12.2262	16.2906	67.8781	17.3557	14.0267	3
81.2408	1.76807	7.38972	12.6147	15.3993	74.2771	17.5271	15.3408	3
72.3381	1.94506	7.43747	12.0825	15.8289	71.0404	18.2607	13.5127	3
72.2841	1.91751	7.43438	12.1456	15.6544	72.2874	18.325	13.7249	3
80.056	1.91232	7.41033	12.2644	16.2029	68.5073	17.3725	14.156	3
71.075	1.81019	10.2414	16.2668	13.4974	68.8043	23.7657	14.5143	3
80.5661	1.85021	7.40146	12.4152	15.8569	70.9916	17.4391	14.6661	3
75.3894	1.84653	7.41663	12.3526	15.4474	73.8252	18.0884	14.4347	3
73.002	1.84903	9.59606	15.3137	14.2024	68.1171	22.2868	14.3052	3
68.8465	1.82515	9.68471	15.421	13.705	71.0692	22.9938	14.283	3
80.7982	1.82196	7.39742	12.4838	15.6995	72.1218	17.4693	14.8982	3
70.6909	1.91149	7.99724	12.9094	15.2198	71.6186	19.5404	13.6944	3
72.8363	1.94749	7.43625	12.0837	15.8811	70.6758	18.1939	13.5187	3
81.0817	1.78745	7.39249	12.5676	15.5072	73.5019	17.5063	15.1817	3
80.1819	1.89699	7.40814	12.3016	16.1175	69.1205	17.3889	14.2819	3
71.9134	1.94299	7.4385	12.0815	15.7843	71.3512	18.3177	13.5075	3
81.7093	1.71105	7.38158	12.7532	15.0815	76.5581	17.5882	15.8093	3
74.9478	1.88825	8.94446	14.3514	14.9144	67.4233	20.7935	14.094	3
76.532	1.96552	7.42724	12.0928	16.2687	67.9717	17.6981	13.5638	3
75.7141	1.96153	7.42923	12.0908	16.1829	68.5702	17.8079	13.5538	3
66.8494	1.73167	11.5118	18.1404	12.0648	70.4743	26.7331	14.9204	3
81.7113	1.7108	7.38154	12.7538	15.0802	76.568	17.5884	15.8113	3
67.3968	1.7573	11.011	17.395	12.5144	70.6373	25.7081	14.7457	3
72.9847	1.94822	7.43589	12.0841	15.8967	70.5673	18.174	13.5205	3
72.6334	1.9465	7.43675	12.0833	15.8598	70.8244	18.2211	13.5163	3
81.4809	1.73885	7.38555	12.6857	15.2364	75.4461	17.5584	15.5809	3
78.0944	1.7847	7.40118	12.533	15.267	75.1648	17.8823	15.053	3
80.6857	1.83566	7.39938	12.4505	15.7758	71.5736	17.4547	14.7857	3
81.1048	1.78463	7.39209	12.5745	15.4915	73.6146	17.5093	15.2048	3
81.3427	1.75568	7.38795	12.6448	15.3302	74.773	17.5403	15.4427	3
